# Supplementary material
Source: HighWire-hosted journal article supplement (https://svn.smart01.highwire.org/content/svn-2022-002185)
Supplement: inline-supplementary-material-1 [file inline-supplementary-material-1.pdf]

**Supplemental Table 1. Independent predictors of futile recanalization (Model 2)**

| Predictors            | Unadjusted OR (95%CI) | P value | Adjusted OR (95%CI) | P value |
|-----------------------|-----------------------|---------|---------------------|---------|
| Admission NIHSS       |                       |         |                     |         |
| ≥19 vs. < 19          | 4.01(2.47-6.51)       | <0.001  | 4.81(2.75-8.40)     | <0.001  |
| PLR                   |                       |         |                     |         |
| ≥162.2 vs. < 162.2    | 2.18(1.35-3.52)       | 0.002   | 1.86(1.09-3.18)     | 0.022   |
| OTP                   |                       |         |                     |         |
| ≥334min vs. < 334 min | 2.17(1.38-3.43)       | 0.001   | 2.11(1.23-3.63)     | 0.007   |
| General anesthesia    |                       |         |                     |         |
| Yes vs. No            | 1.73(1.10-2.72)       | 0.018   | 1.88(1.09-3.25)     | 0.024   |

Model 2 was a back-stepwise multivariable regression analysis including PC-ASPECTS ( < 7 vs. ≥ 7), NLR, PLR, NIHSS, OTP, procedure duration, use of GA, and use of heparin during the procedure. Abbreviations: PLR = platelet to lymphocyte ratio; NIHSS = National Institute of Health Stroke Scale; OTP = Onset-to-puncture time.

Supplemental Figure 1. Independent predictors of futile recanalization

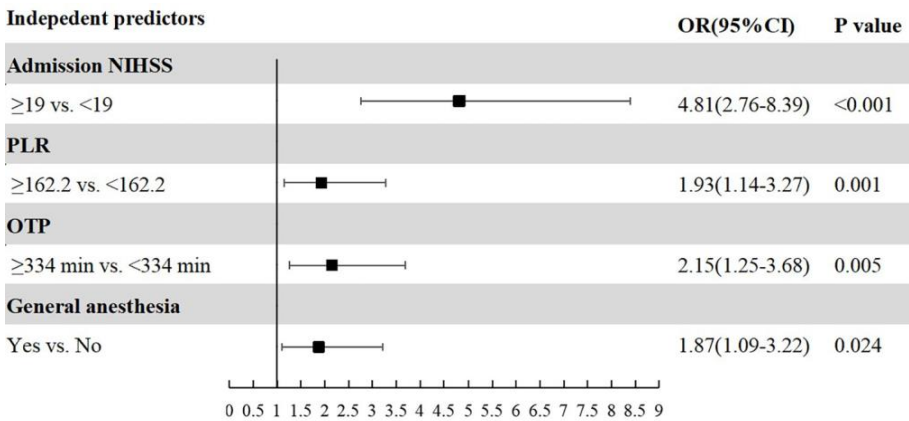

Abbreviations: PLR = platelet to lymphocyte ratio; NIHSS = National Institute of Health Stroke Scale; OTP = Onset-to-puncture time.

**Supplemental Figure 2. ROC curve of NIHSS, PLR, OTP, NLR, and procedure duration**

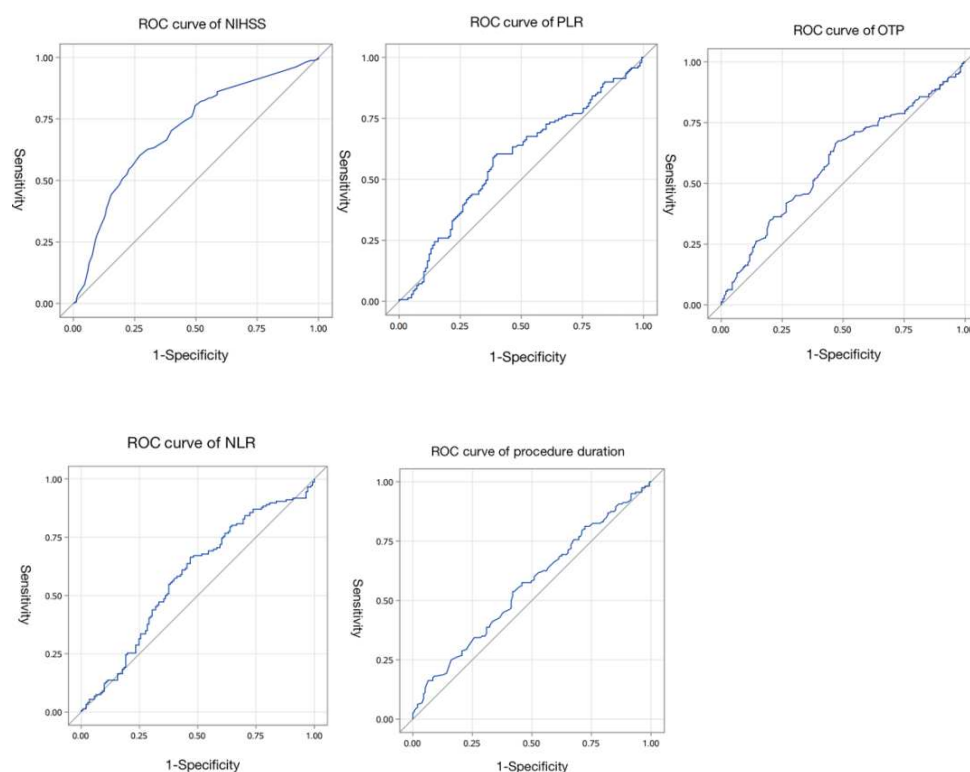

Abbreviations: PLR = platelet to lymphocyte ratio; NIHSS = National Institute of Health Stroke Scale; OTP = Onset-to-puncture time; NLR = neutrophil-lymphocyte ratio; ROC = receiver operating characteristic.
